# Supplementary material for: Host–guest complexation of HMeQ[7] with alkyldiammonium ions and alkyldiamines: a comparative study
Source: Royal Society of Chemistry journal article supplement (doi:10.1039/c5ra23758k), 2016-01-01
Supplement: c5ra23758k1.pdf [file c5ra23758k1.pdf]

## Electronic Supplementary Information (ESI)

### Host-guest complexation of HMeQ[7] with alkyldiammonium ions and alkyldiamines: A comparative study

---

*a* W.-X. Zhao, C.-Z. Wang, L.-X. Chen, X.-W. Cui, Q.-J. Zhu, Z. Tao

Key Laboratory of Macrocyclic and Supramolecular Chemistry of Guizhou Province, Guizhou University, Guiyang 550025, China

[gzutao@263.net](mailto:gzutao@263.net)

*b* R.-L. Lin, J.-X. Liu

College of Chemistry and Chemical Engineering, Anhui University of Technology, Maanshan 243002, China

[jxliu411@ahut.edu.cn](mailto:jxliu411@ahut.edu.cn)

### Table of Contents

|                                                                                 |     |
|---------------------------------------------------------------------------------|-----|
| Figure S1 <sup>1</sup> H NMR spectra of HMeQ[7] with guest <b>1</b> .....       | 2   |
| Figure S2 <sup>1</sup> H NMR spectra of HMeQ[7] with guest <b>2</b> .....       | 3   |
| Figure S3 <sup>1</sup> H NMR spectra of HMeQ[7] with guest <b>3</b> .....       | 4   |
| Figure S4 <sup>1</sup> H NMR spectra of HMeQ[7] with guest <b>4</b> .....       | 5   |
| Figure S5 <sup>1</sup> H NMR spectra of HMeQ[7] with guest <b>5</b> .....       | 6   |
| Figure S6 ITC profile of HMeQ[7] with all guests.....                           | 7/8 |
| Figure S7 NOESY NMR spectrum of HMeQ[7] with guest <b>3</b> <sup>2+</sup> ..... | 9   |
| Figure S8 NOESY NMR spectrum of HMeQ[7] with guest <b>4</b> <sup>2+</sup> ..... | 10  |

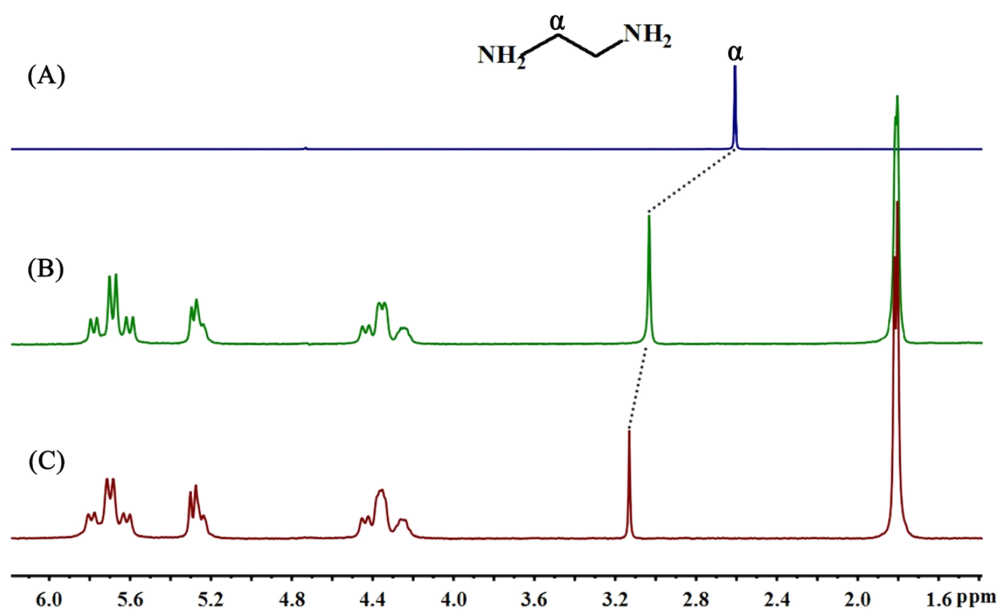

**Figure S1.** <sup>1</sup>H NMR spectra (400 MHz, D<sub>2</sub>O) of guest **1** (A) in the absence and in the presence of (B) 0.75 and (C) 1.63 equiv of HMeQ[7] in D<sub>2</sub>O at 20 °C.

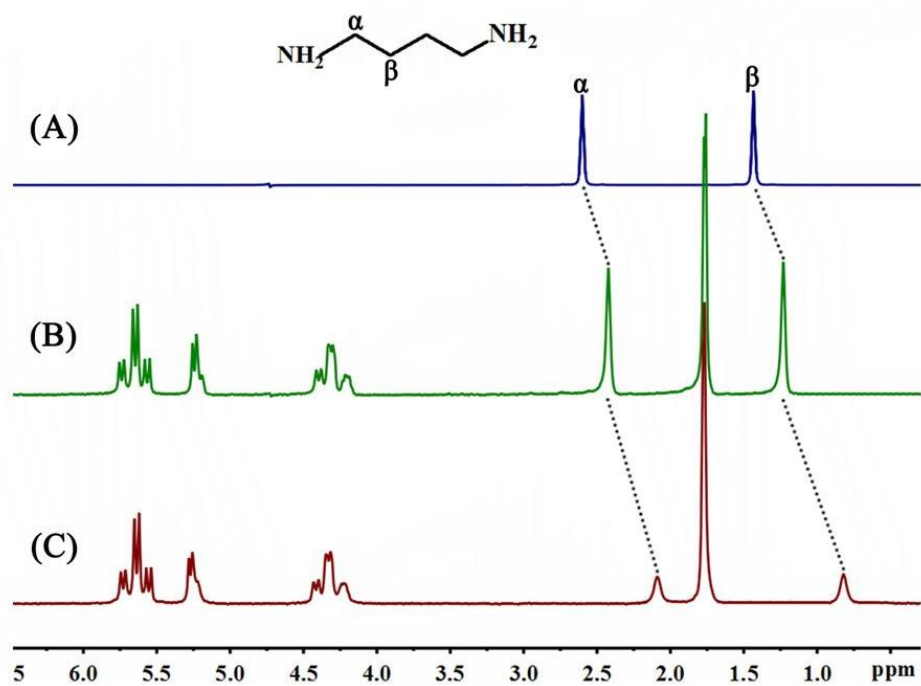

**Figure S2.** <sup>1</sup>H NMR spectra (400 MHz, D<sub>2</sub>O) of guest **2** (A) in the absence and in the presence of (B) 0.34 and (C) 1.12 equiv of HMeQ[7] in D<sub>2</sub>O at 20 °C.

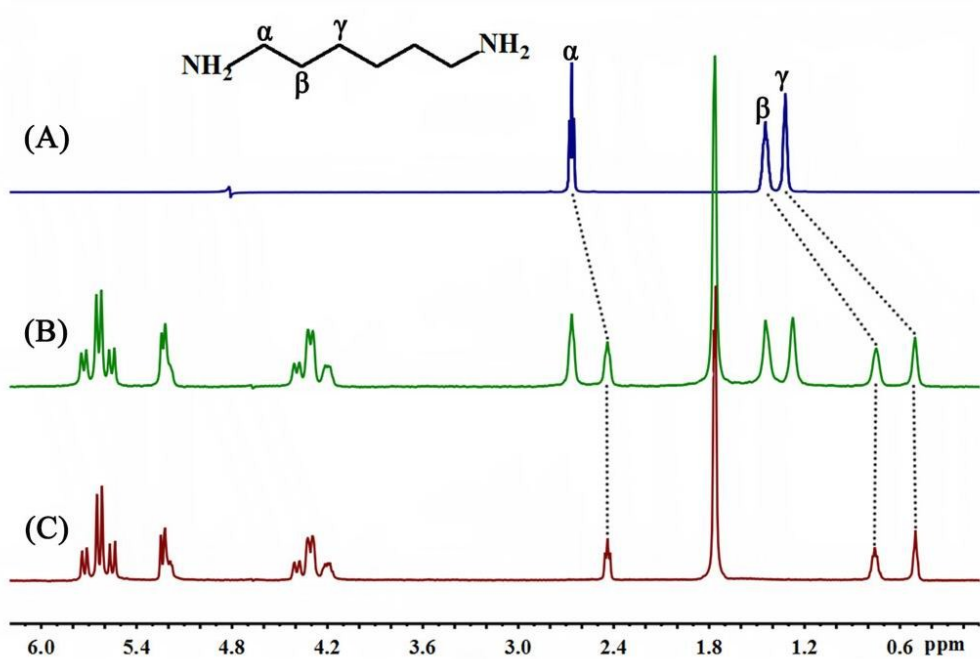

**Figure S3.** <sup>1</sup>H NMR spectra (400 MHz, D<sub>2</sub>O) of guest **3** (A) in the absence and in the presence of (B) 0.40 and (C) 1.13 equiv of HMeQ[7] in D<sub>2</sub>O at 20 °C.

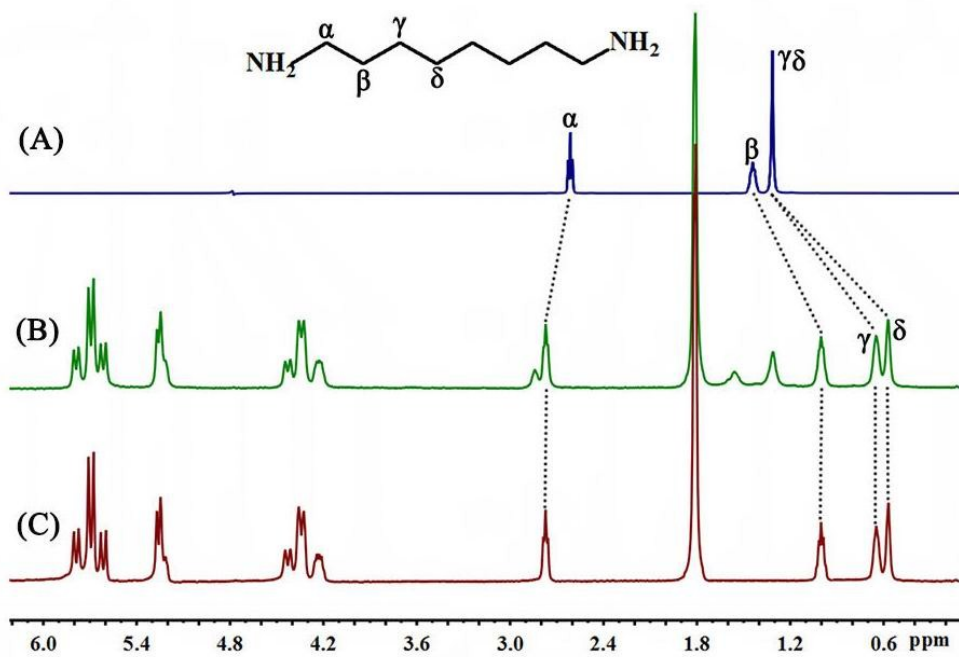

**Figure S4.**  $^1\text{H}$  NMR spectra (400 MHz,  $\text{D}_2\text{O}$ ) of guest 4 (A) in the absence and in the presence of (B) 0.79 and (C) 1.13 equiv of HMeQ[7] in  $\text{D}_2\text{O}$  at 20  $^\circ\text{C}$ .

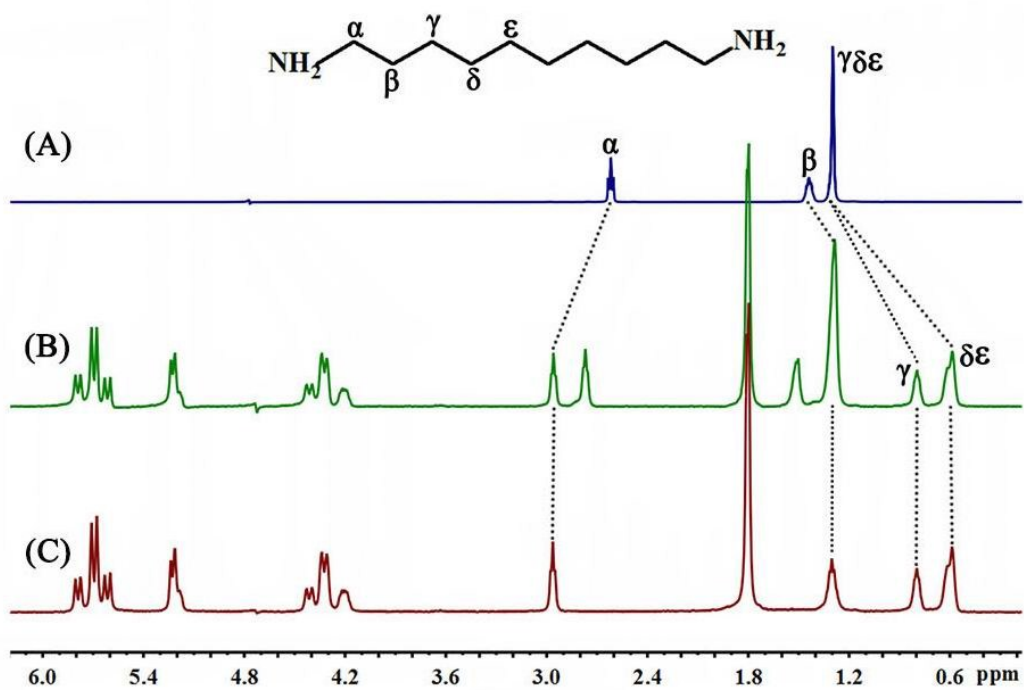

**Figure S5.**  $^1\text{H}$  NMR spectra (400 MHz,  $\text{D}_2\text{O}$ ) of guest **5** (A) in the absence and in the presence of (B) 0.42 and (C) 1.02 equiv of HMeQ[7] in  $\text{D}_2\text{O}$  at 20  $^\circ\text{C}$ .

(a)

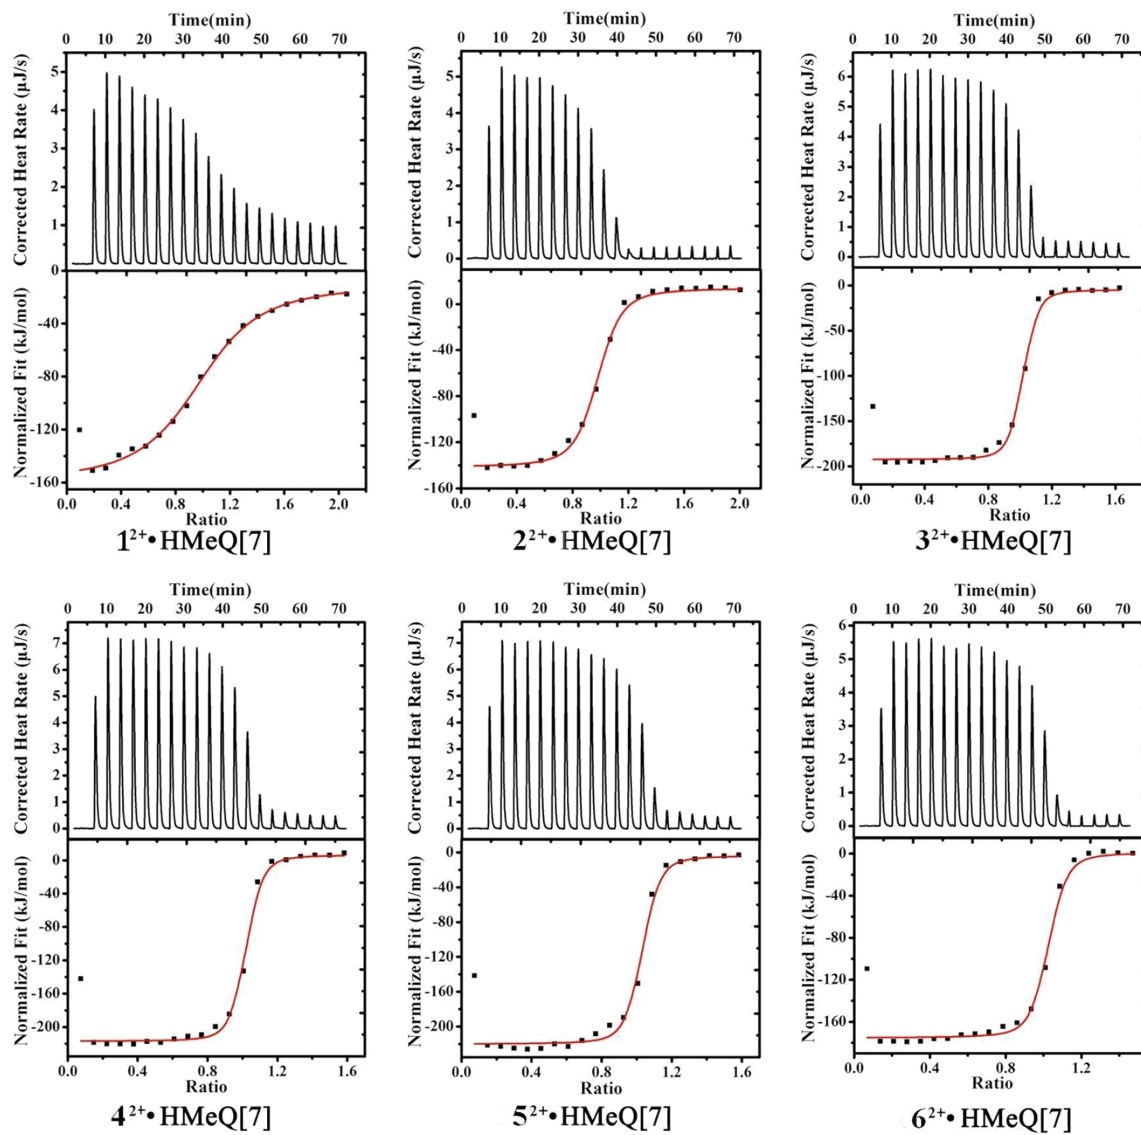

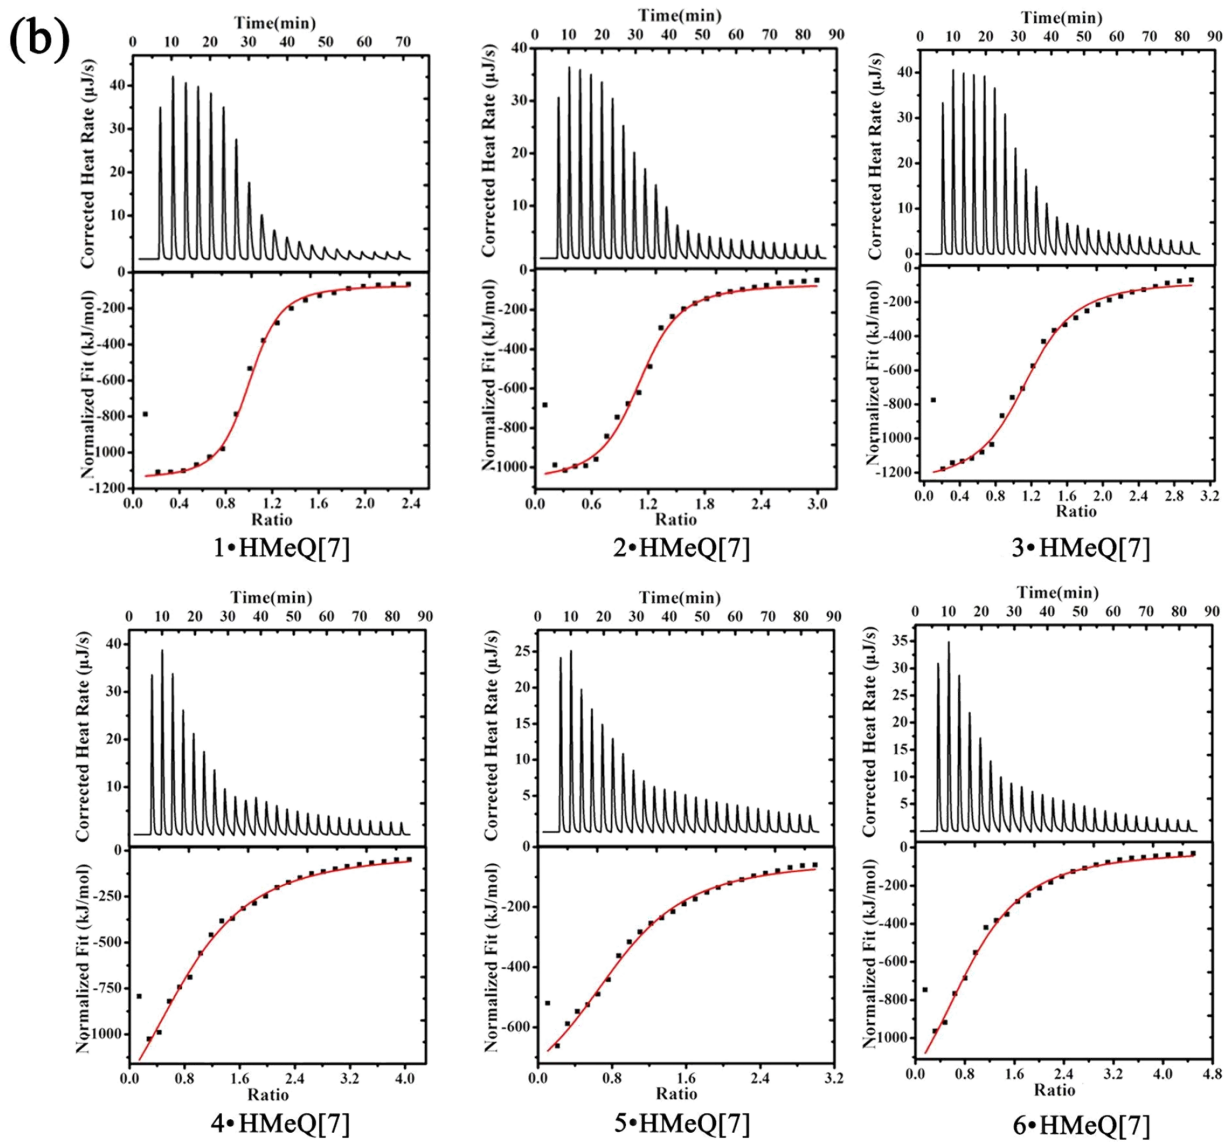

**Figure S6.** Isothermal titration calorimetry (ITC) binding curves for (a) HMeQ[7] - alkyldiammonium and (b) HMeQ[7]-alkyldiamine complexes.



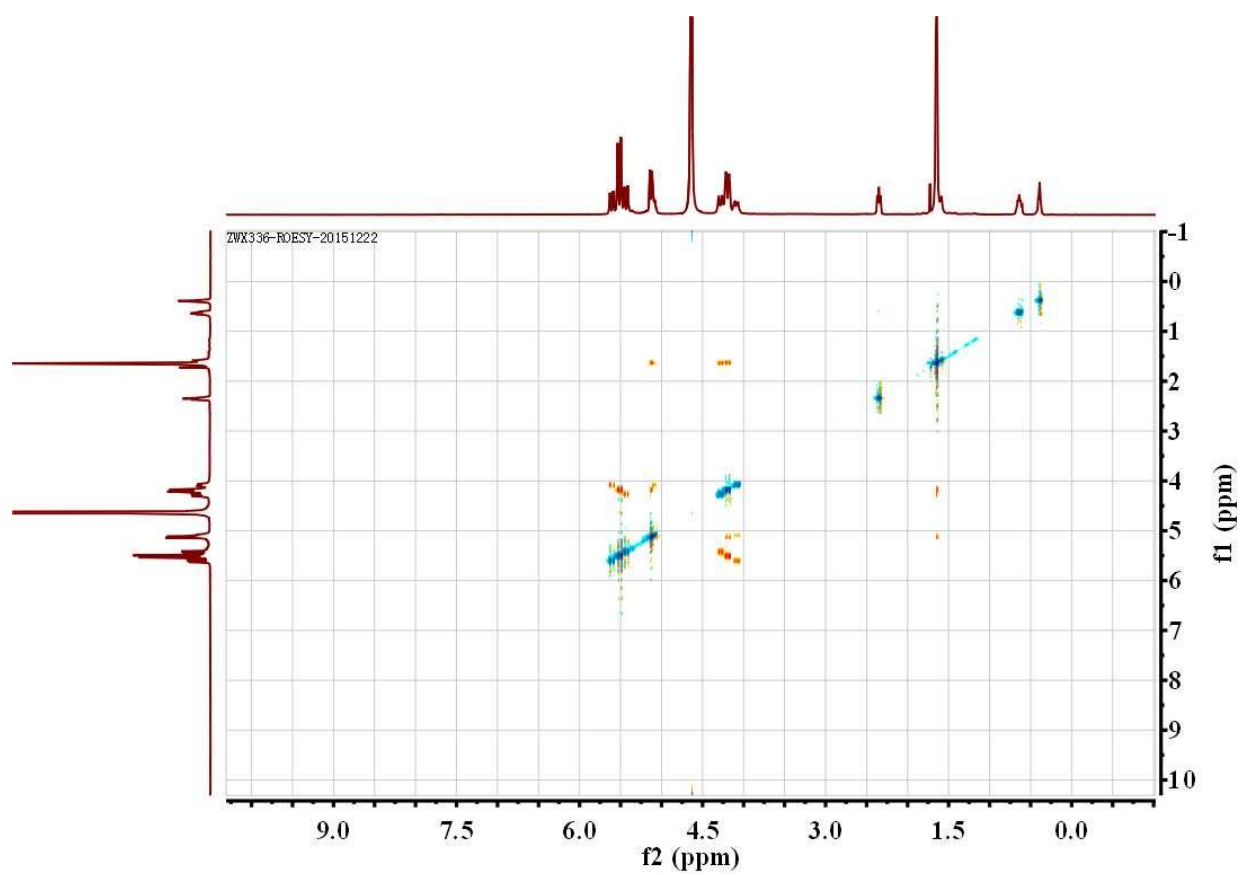

**Figure S7.** NOESY NMR spectrum (400 MHz, D<sub>2</sub>O) of HMeQ[7] with guest 3<sup>2+</sup>.

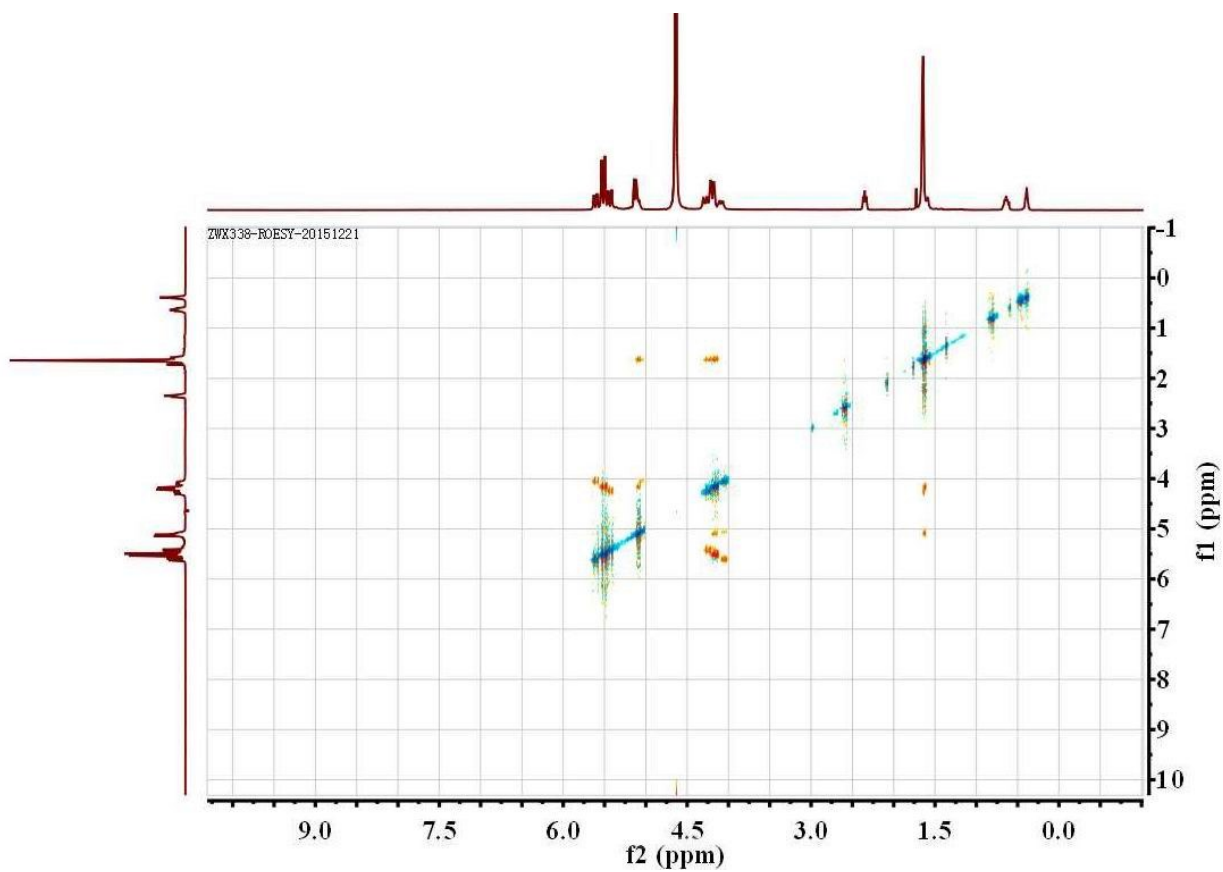

**Figure S8.** NOESY NMR spectrum (400 MHz, D<sub>2</sub>O) of HMeQ[7] with guest 3<sup>2+</sup>.
